# Supplementary material for: Transcription factors involved in retinogenesis are co-opted by the circadian clock following photoreceptor differentiation
Source: PubMed Central journal article supplement (PMC4146392; doi:10.1242/dev.104380), 2014-07
Supplement: supp_141.13.2644_DEV104380.pdf [file supp_141.13.2644_DEV104380.pdf]

**Fig. S1. NanoString analysis of gene expression during zebrafish larval development.** Heat map of all genes included in the NanoString analysis (n=3, ordered alphabetically). For each gene, three different lighting conditions are presented: light-dark cycle from 4 to 7 dpf (LD); constant light from 4 to 6 dpf (LL); light-dark cycle until 6 dpf and then transferred to constant darkness on day 7 (DD). Expression values are presented in a colour range from white (lowest) to red (highest). Grey bars represent time points not included in our analysis.

**Fig. S2. Limited photoreceptor differentiation after 5 days of zebrafish development.** (A,B) Representative cross-sections of 7 dpf larval eyes (48 hours after BrdU pulse) immunostained for BrdU and the cone marker *zpr-1* (A) or BrdU and the rod marker *zpr-3* (B). DAPI was used as a nuclear counterstain. CMZ, circumferential marginal zone. Scale bars: 50  $\mu\text{m}$ .

**Fig. S3. Expression of retinal transcription factors in zebrafish larvae.** (A-E) Representative images of WISH for *crx* (A), *rx1* (B), *rx2* (C), *nrl* (D), and *nr2e3* (E) on 6 dpf larvae at four different time points. Scale bars: 100  $\mu\text{m}$ .

**Fig. S4. Expression of rod and cone photoreceptor markers in adult retina.** (A,B) Representative images of *in situ* hybridisation for rod  $\alpha$ -transducin (*gnat1*) (A) and cone  $\alpha$ -transducin (*gnat2*) (B) on adult eye sections at four different time points. The expression pattern of each marker varies considerably throughout the day due to the positional changes of photoreceptor outer segments (retinomotor movements). Note that the *gnat1* signal present in the layer of cone nuclei (CN) corresponds to rod inner segments that connect the rod nuclei (RN) to the rod outer segments. RPE, retinal pigment epithelium; POS, photoreceptor outer segments; CN, cone nuclei; RN, rod nuclei; INL, inner nuclear layer; IPL, inner plexiform layer; GCL, ganglion cell layer. Scale bars: 30  $\mu\text{m}$ .

**Fig. S5. Expression of retinal transcription factors in zebrafish adult retina.** (A-D) Representative images of *in situ* hybridisation for *crx* (A), *rx1* (B), *rx2* (C), and *nrl* (D) on adult eye sections at four different time points. Note that expression of *nrl* at ZT21 is restricted to rod photoreceptors. The signal present in the layer of cone nuclei (CN) corresponds to rod inner segments that connect the rod nuclei (RN) to the rod outer segments. RPE, retinal pigment epithelium; POS, photoreceptor outer segments; CN, cone nuclei; RN, rod nuclei; INL, inner nuclear layer; IPL, inner plexiform layer; GCL, ganglion cell layer. Scale bars: 30  $\mu\text{m}$ .

**Fig. S6. Expression of *crx* in zebrafish adult photoreceptors.** Representative maximum projection confocal images of double fluorescent *in situ* hybridisation for *crx* and cone  $\alpha$ -transducin (*gnat2*) or *crx* and rod  $\alpha$ -transducin (*gnat1*) on adult eye sections at ZT15. DAPI was used as a nuclear counterstain. POS, photoreceptor outer segments; CN, cone nuclei; RN, rod nuclei; INL, inner nuclear layer. Scale bars: 15  $\mu$ m.

**Fig. S7. Expression of cone-specific phototransduction genes in zebrafish adult eye.** (A) qPCR analysis of cone-specific phototransduction genes in adult eyes over two days of a LD cycle and one subsequent day of DD (n=3-4). These two genes exhibited a clear circadian expression profile. (B) qPCR analysis of other cone-specific phototransduction genes that did not exhibit a clear circadian regulation in adult eyes (n=3-4). Note that some genes (e.g. *opn1lw1*, *gnb3b*, and *ngt2b*) appear to be rhythmically expressed on a LD cycle, but this rhythmicity is not maintained in DD. Zeitgeber time (ZT) or circadian time (CT) indicates the four time points analysed per day. White and grey backgrounds represent light and dark phases, respectively. Statistically significant differences between the expression peak and trough on each day (Fisher's LSD test) are indicated: \* $P < 0.05$ , \*\* $P < 0.01$ , \*\*\* $P < 0.001$ . Error bars indicate s.e.m.

**Fig. S8. Expression of rod-specific phototransduction genes in zebrafish adult eye.** qPCR analysis of rod-specific phototransduction genes that did not exhibit a clear circadian regulation in adult eyes (n=3-4). Note that some genes (e.g. *gnb1b*, and *ngt1*) appear to be rhythmically expressed on a LD cycle, but this rhythmicity is not maintained in DD. Zeitgeber time (ZT) or circadian time (CT) indicates the four time points analysed per day. White and grey backgrounds represent light and dark phases, respectively. Statistically significant differences between the expression peak and trough on each day (Fisher's LSD test) are indicated: \* $P < 0.05$ , \*\* $P < 0.01$ , \*\*\* $P < 0.001$ . Error bars indicate s.e.m.



**Fig. S1 (Cont.)**

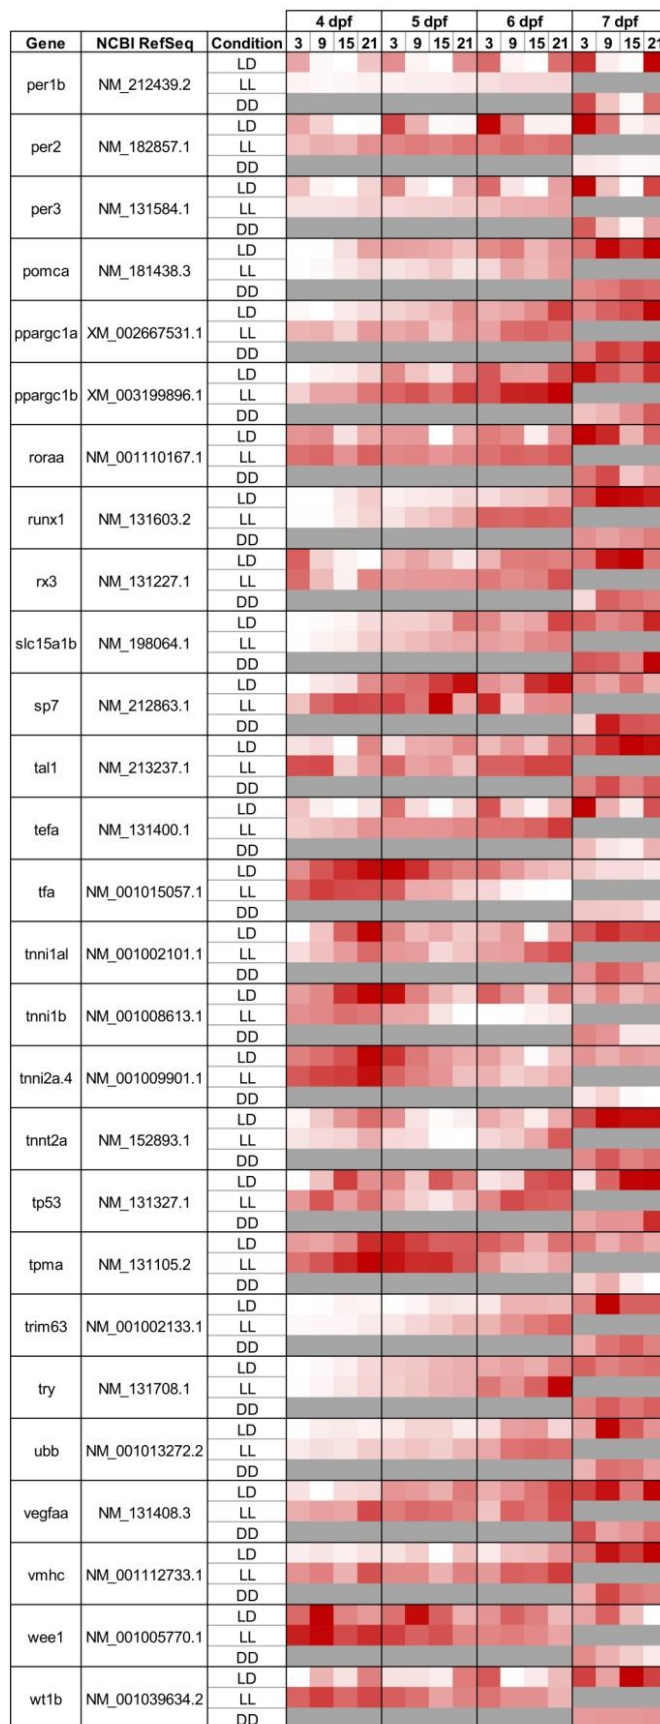

Fig. S2

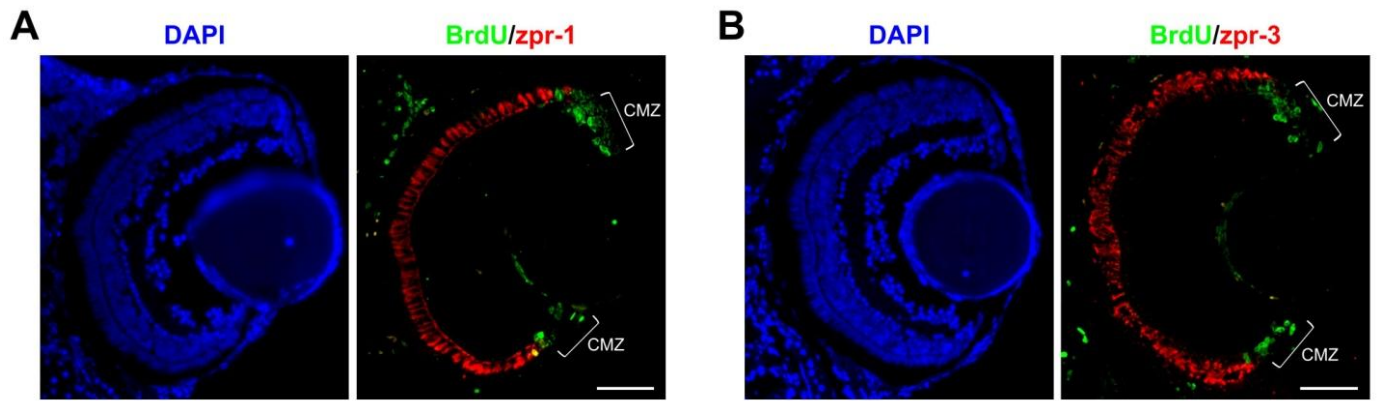

Fig. S3

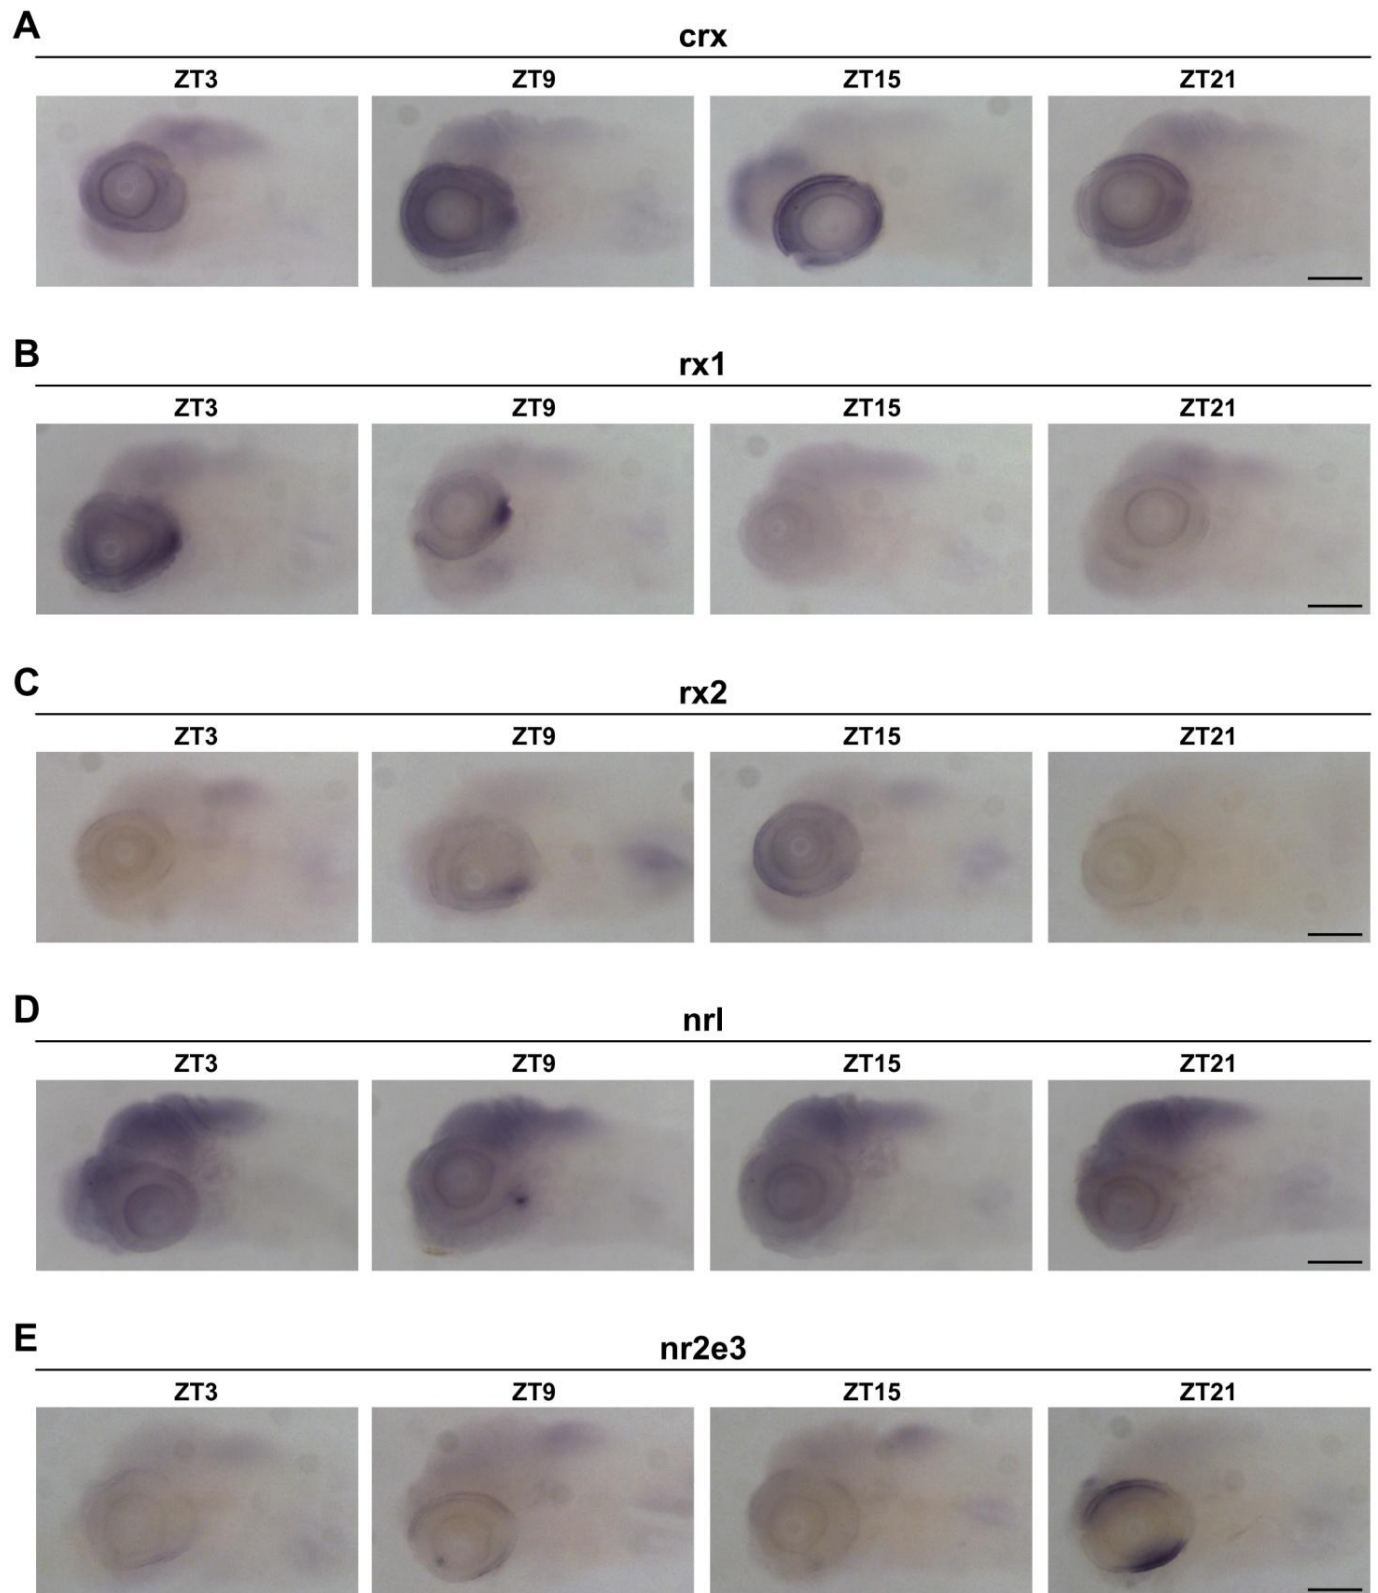

Fig. S4

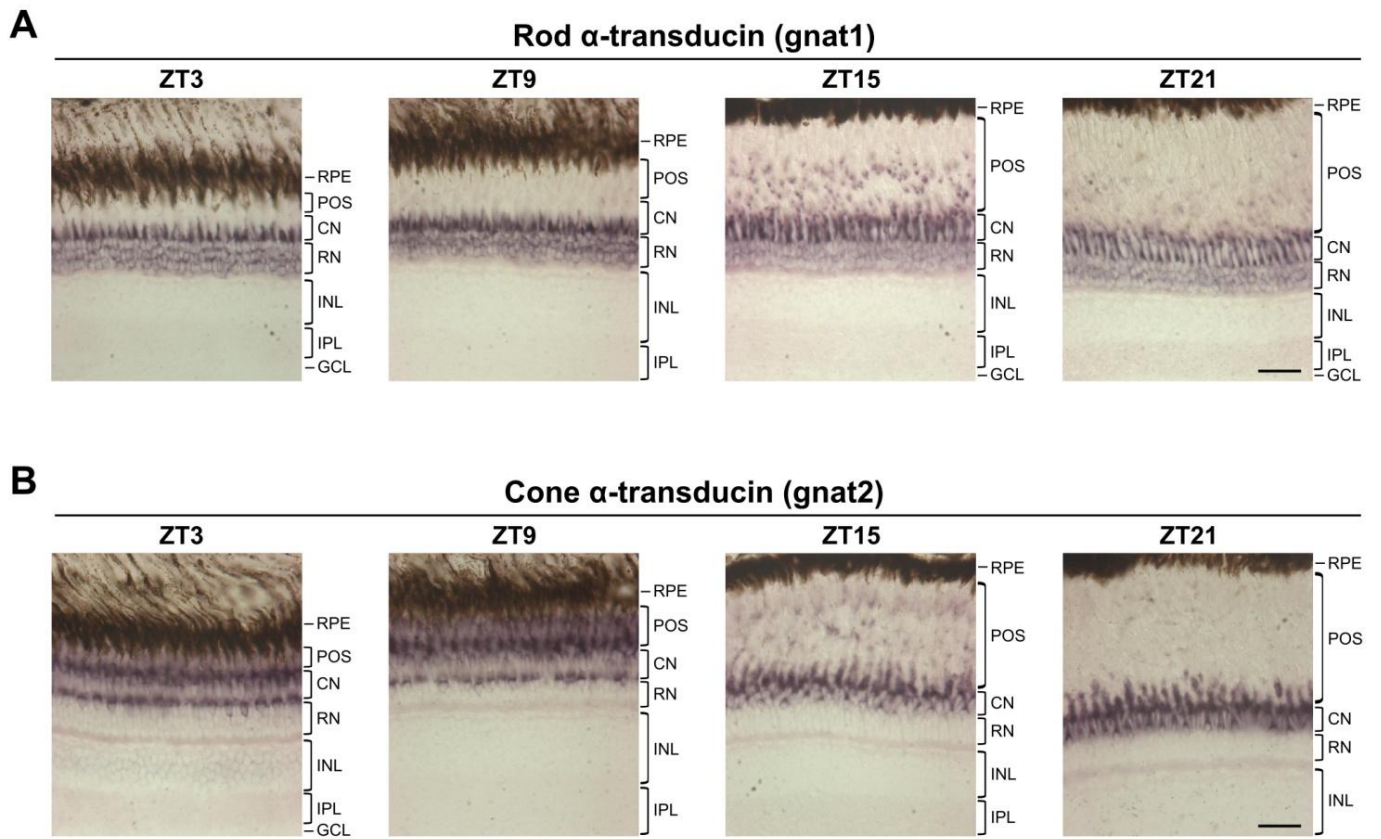

Fig. S5

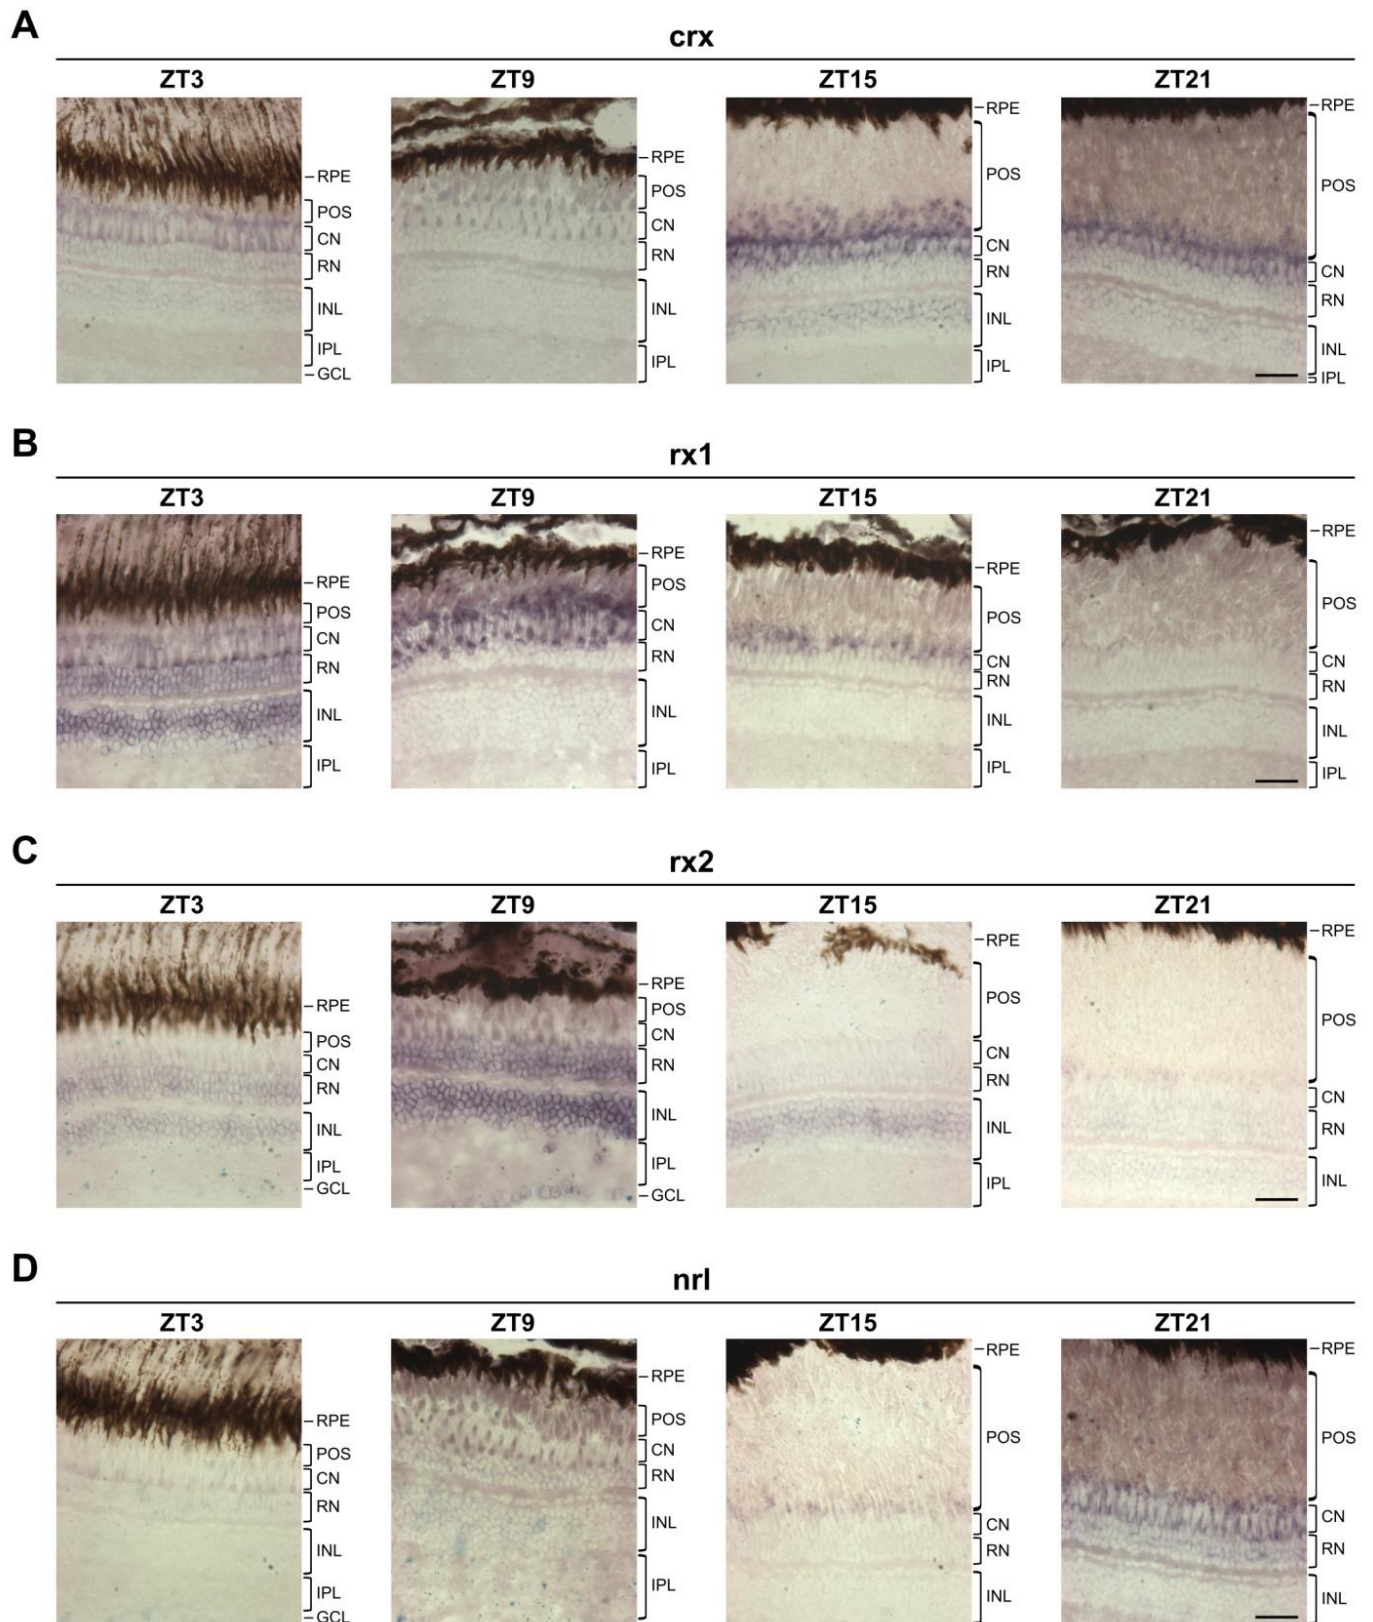



Fig. S6

ZT15

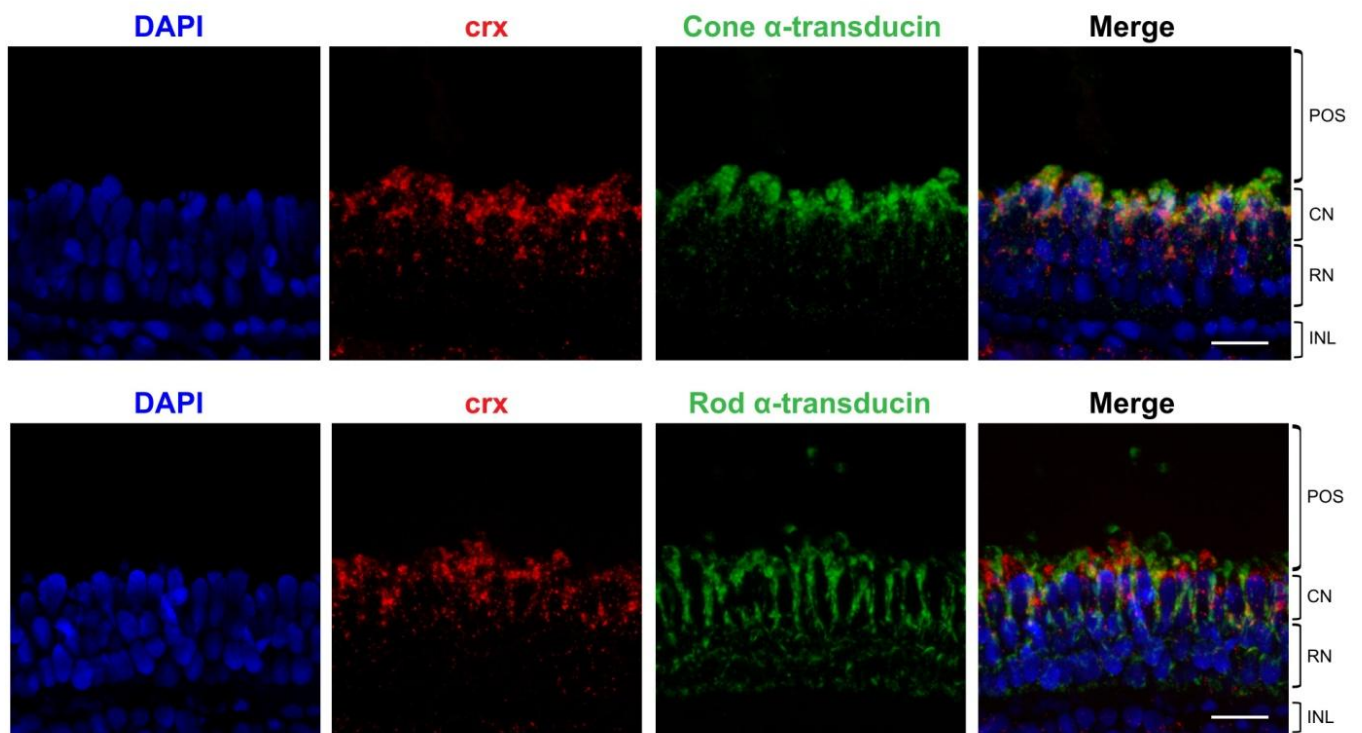

Fig. S7

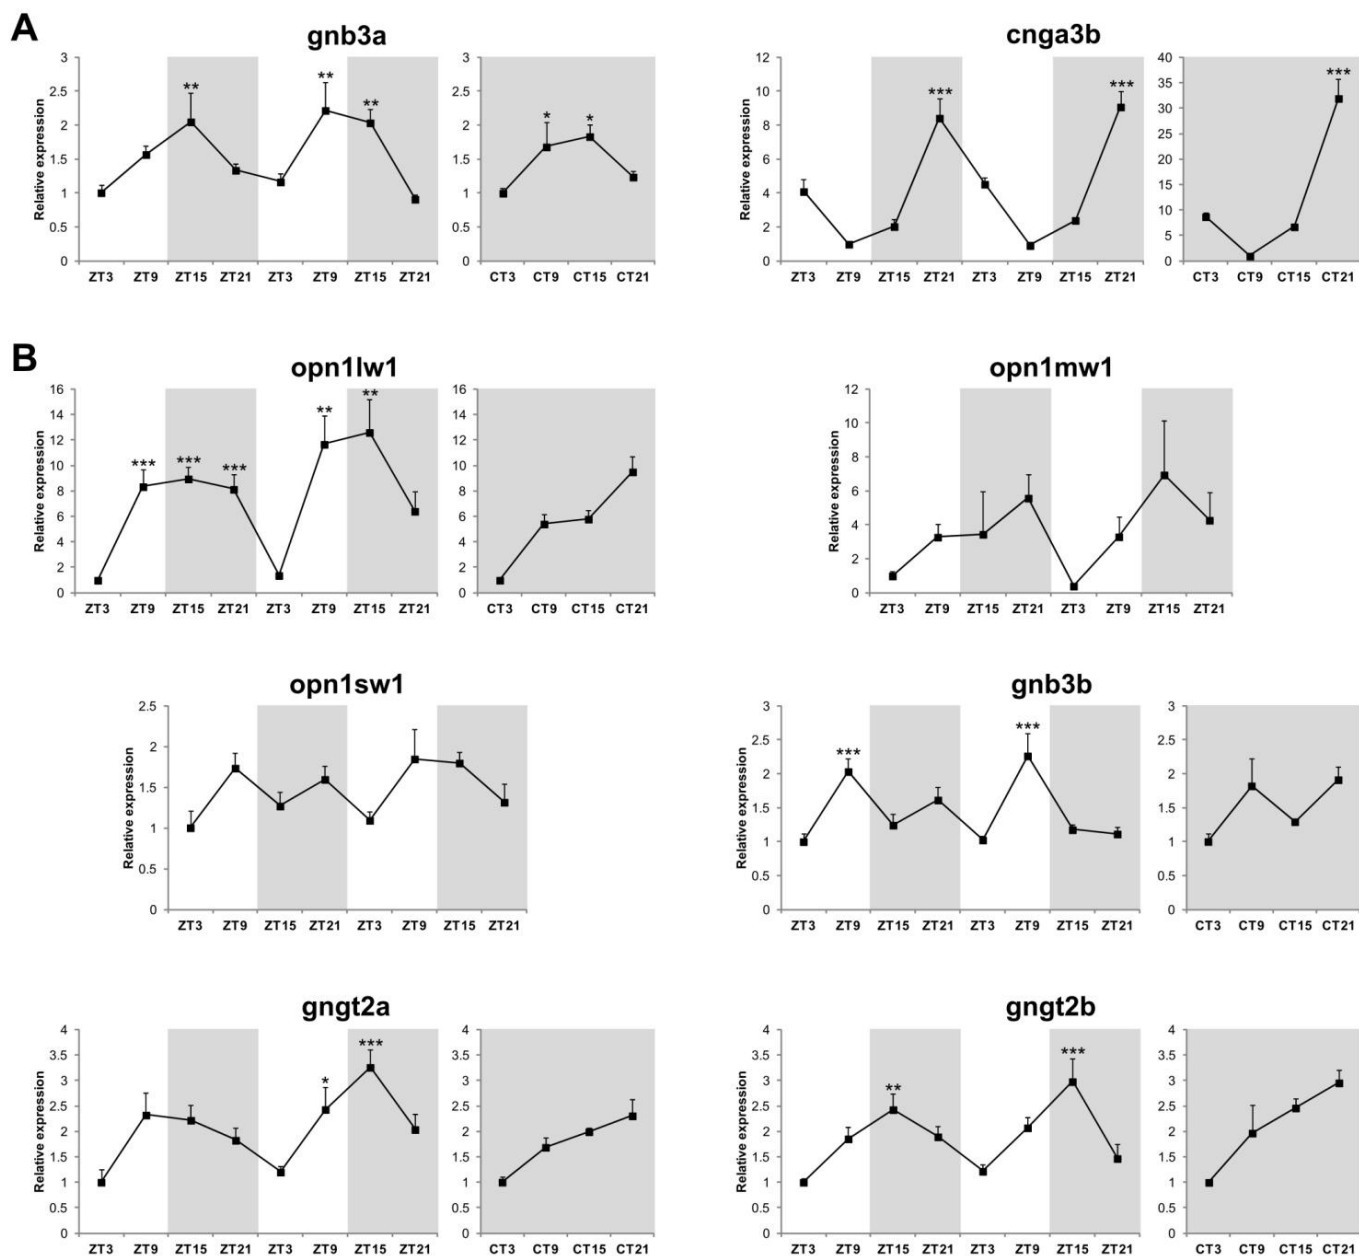

Fig. S8

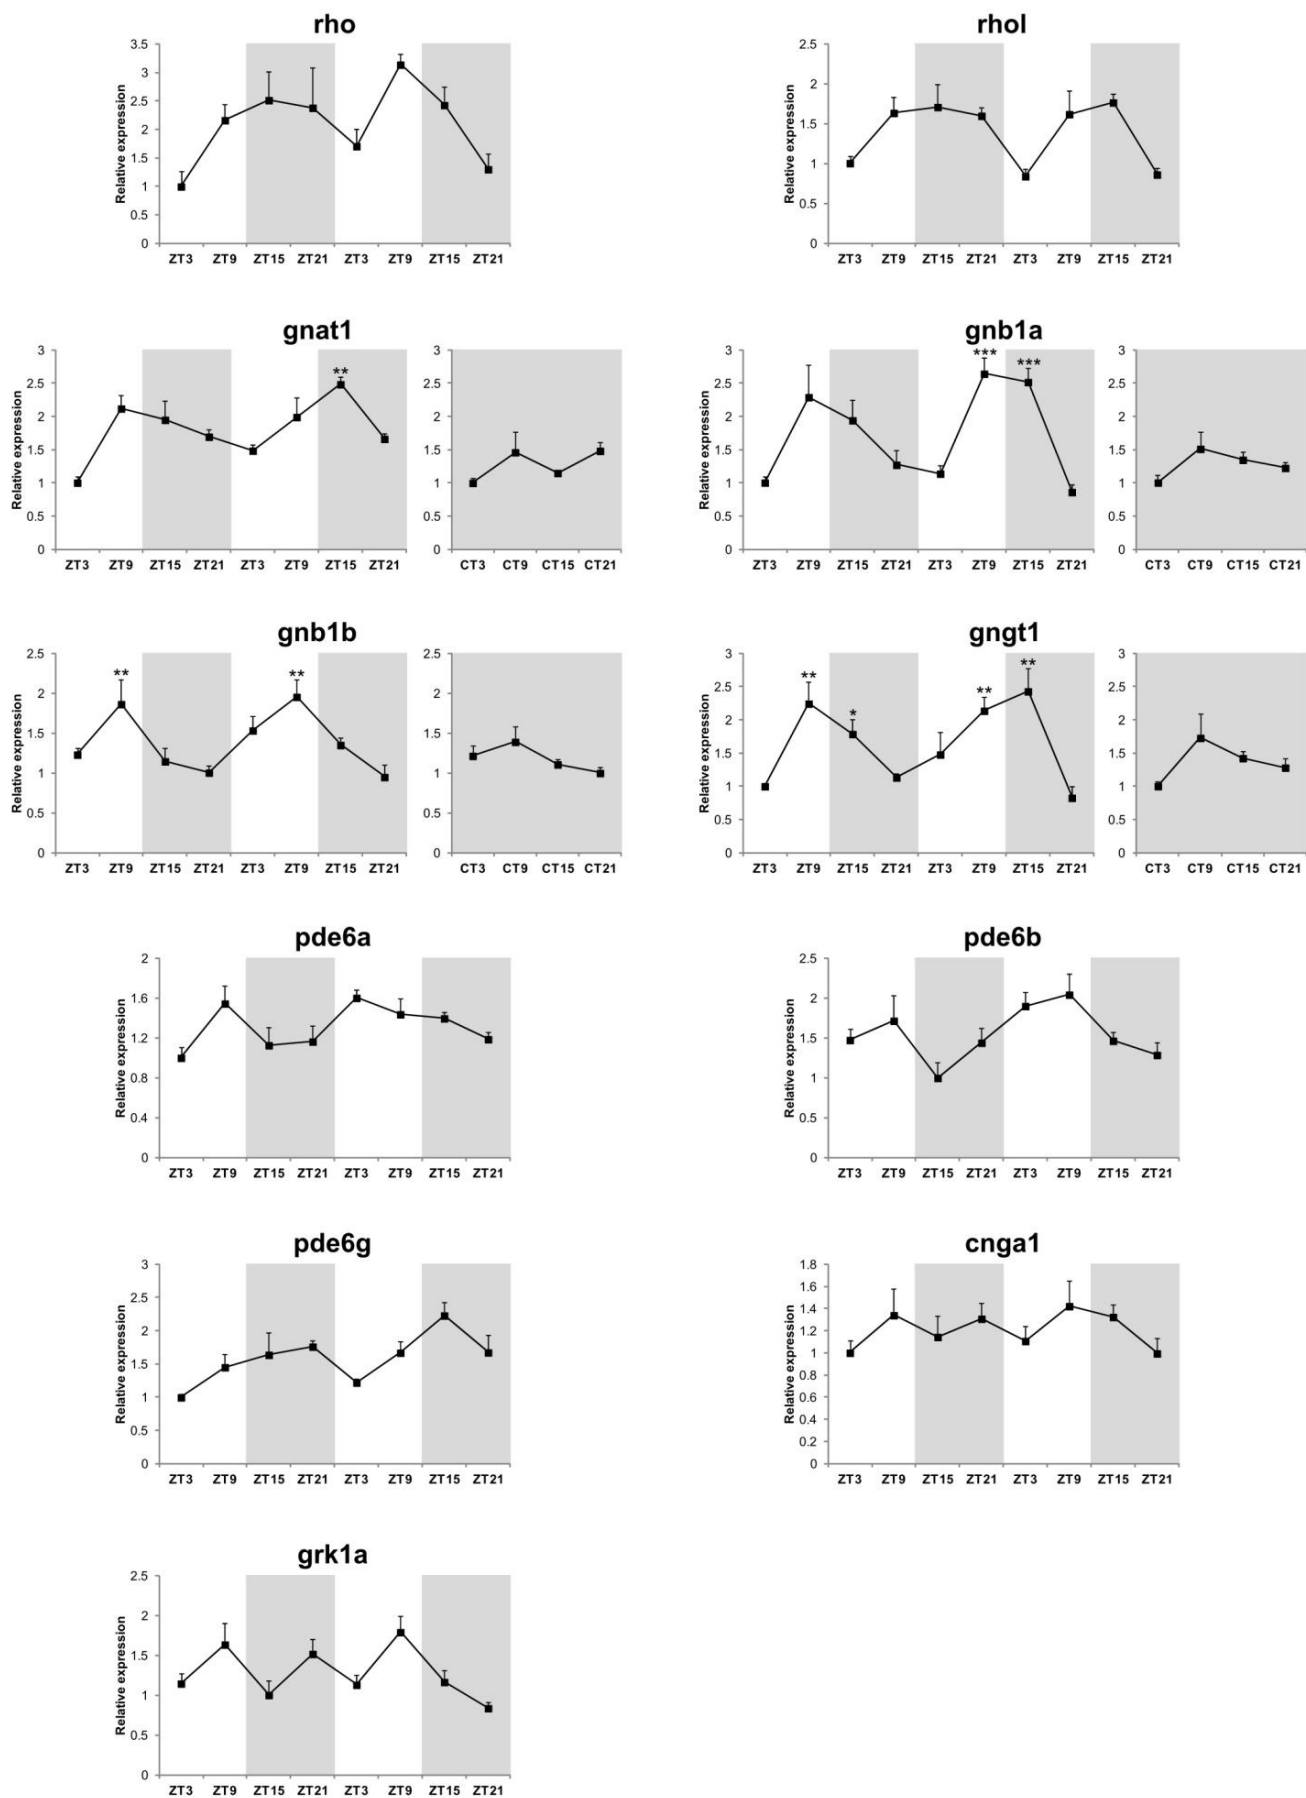

**Table S1. Primers used for qPCR analysis.**

| <b>Gene</b>     | <b>Forward primer (5'-3')</b> | <b>Reverse primer (5'-3')</b> | <b>Product size (bp)</b> |
|-----------------|-------------------------------|-------------------------------|--------------------------|
| <i>arr3a</i>    | GAGGAGAAGATCGCCCATCG          | CTGGCCATTTCCACTGGTCT          | 93                       |
| <i>arr3b</i>    | GCATGTGCCTTTCGCTATGG          | CTGCATTGGTGTGTTTGGGG          | 129                      |
| <i>cnga1</i>    | ATCGCAGAACCGCCAACATA          | CGGATATTCAGTCAGCGCCT          | 92                       |
| <i>cnga3a</i>   | ATGAGACACGAATCAGCCCA          | TCCTGCTCAGCGTGATGTAA          | 119                      |
| <i>cnga3b</i>   | ATCAGTGACCCCGAGTTTGG          | AATGGTGGTGAGCGTGAGAG          | 81                       |
| <i>cngb3</i>    | CCAACCTCTTCGTGCTGGAT          | TGCCTTTGGCCTTCATCAGT          | 111                      |
| <i>crx</i>      | ATCCACTGTGTGGTTCAGGC          | GCTGTAGGAAGAGGGCTGAC          | 83                       |
| <i>eef1a11l</i> | CAGCTGATCGTTGGAGTCAA          | TGTATGCGCTGACTTCCTTG          | 94                       |
| <i>gnat1</i>    | CCGTTACTTCGCCACCACAT          | GAAGGTGTTGGGACCGTCAT          | 121                      |
| <i>gnat2</i>    | CGTGATCTGAGGTACAGGGC          | GCTACCCATCTCGTCGTCTG          | 122                      |
| <i>gnb1a</i>    | TGCCACCCTCTCTCAGATCA          | CAAGTGTCCCCTCAGTGTCC          | 85                       |
| <i>gnb1b</i>    | AGATGCCAATCATGCGTTTTGT        | CTTTCACAGGAGGGCGCATA          | 105                      |
| <i>gnb3a</i>    | GGTGAAATGGAGCAACTGCG          | GTGTAAGGTCCTGCACGGTT          | 85                       |
| <i>gnb3b</i>    | GCTGTTCCCTGAAGTCCTC           | ACATGTTATCCAGTCCGCCG          | 88                       |
| <i>ngt1</i>     | TCCAGAGGAGAAGAACCCGT          | ACTGCGAATGTTGGGGGATT          | 83                       |
| <i>ngt2a</i>    | TCAGTTCATCGCCAGACCAC          | GGCCATCTTGCCCTATTGGT          | 105                      |
| <i>ngt2b</i>    | GCCAGAGGACAAGAACCCAT          | AAGCATTTCTAGGACCGGCA          | 129                      |
| <i>grk1a</i>    | GCTGTACGCCTGCAAGAAAC          | TCCACCATCGCTCCCTCATA          | 72                       |
| <i>grk7a</i>    | AGGACGAGTCTGGACAAGGA          | GTAAGGCGGAACAGCTTCT           | 75                       |
| <i>neuroD</i>   | CGGTCTTCCCAGCCCTCCGT          | GAACGGCTCCAGTGCCTCC           | 91                       |
| <i>nr2e3</i>    | TGGAAAGGTCCTGAACACGG          | CTGCGCTTGAAAAAGCCACT          | 111                      |
| <i>nrl</i>      | GCTTCCAGCGATGTCTTCT           | GGGGTGTGAGGCTTTACCTC          | 114                      |
| <i>opn1lw1</i>  | AGATGCAATTTATGCAGCCCG         | CATCGAGGGGCAATGTGGTA          | 126                      |
| <i>opn1mw1</i>  | ACACCTTTTCTGTGGCAAG           | ATGACGGAGCACTGAATAGGC         | 120                      |
| <i>opn1sw1</i>  | TTCCAAAGTCAGCCCTTCG           | GTTTCATAGGTGTGCCACGA          | 112                      |
| <i>pde6a</i>    | CAGTCAACAAGATCGGGGCT          | GCTCAGGTGAAACACTCGGA          | 104                      |
| <i>pde6b</i>    | TGGCCTCCAAATTCGGAAA           | AGCATTGTGGCTTGCACTTG          | 80                       |
| <i>pde6c</i>    | CACAGTTCCTGGGATGGTCC          | CGGAGTGGCTTTGGTCTGAT          | 116                      |
| <i>pde6g</i>    | TTCAAGAGCAAGCCCCAAA           | AGCTCCAGATGGTTGAAGGC          | 122                      |
| <i>pde6h</i>    | AGAGAGGAGGACCACCAAAGT         | CCATTCTGGGATGTCGTCT           | 105                      |
| <i>rho</i>      | ACTTCCGTTTCGGGGAGAAC          | GAAGGACTCGTTGTTGACAC          | 176                      |
| <i>rho1</i>     | GCGGTGGCTGACTTGTATTAT         | CTCAACAGCCAGAACAACCA          | 165                      |
| <i>rx1</i>      | GGACCAGGATTCGTTGCTCA          | ATCCCTAAGGGGTGGCAGAT          | 130                      |
| <i>rx2</i>      | TCCAGCCCACCTATACTGCT          | ACTGGTTGGCATTGGTAGGG          | 103                      |
| <i>saga</i>     | TGTCACATTGTCTGCGTGT           | CTGCCGGGTGGAATGTAGA           | 97                       |
| <i>sagb</i>     | TTGTGCTGATCGACCCAGAG          | ATATCCCTGCGAAACGCCAT          | 118                      |
